# Supplementary material for: A Role for Taiman in Insect Metamorphosis
Source: PubMed Central journal article supplement (PMC4214675; doi:10.1371/journal.pgen.1004769), 2014-10-30
Supplement: pgen.1004769.s007.pdf [file pgen.1004769.s007.pdf]

**Table S1.** Summary of the effects of Tai depletion at phenotypic level in the experiments treating with dsTai-core, dsTai-in-1 and dsTai-in-2 at the instar N4 and/or N5. The corresponding dsRNA was administered in one or two doses depending on the experiment. Controls were equivalently treated with dsMock as indicated. Methodological details are described in the main text.

| Instar of treatment | Dose applied each day | dsRNA day 0             | dsRNA day 3             | N  | Died before N6 | Died N6 and Adult | Nymphoid with adult features in N6 | Precocious adult in N6 | Adult with stretched wings after N6 | Normal adult after N6 |
|---------------------|-----------------------|-------------------------|-------------------------|----|----------------|-------------------|------------------------------------|------------------------|-------------------------------------|-----------------------|
| N5                  | 3 µg                  | dsTai-core              | dsTai-core              | 18 | 18             | 0                 | 0                                  | 0                      | 0                                   | 0                     |
| N5                  | 3 µg                  | dsMock                  | dsMock                  | 14 | 0              | 0                 | 0                                  | 0                      | 0                                   | 14                    |
| N5                  | 0.5 µg                | dsTai-core              | -                       | 16 | 14             | 0                 | 0                                  | 0                      | 1                                   | 1                     |
| N4                  | 3 µg                  | dsTai-core              | dsTai-core              | 12 | 12             | 0                 | 0                                  | 0                      | 0                                   | 0                     |
| N4                  | 3 µg                  | dsMock                  | dsMock                  | 15 | 0              | 0                 | 0                                  | 0                      | 0                                   | 15                    |
| N4                  | 0.5 µg                | dsTai-core              | -                       | 7  | 7              | 0                 | 0                                  | 0                      | 0                                   | 0                     |
| N4                  | 0.3 µg                | dsTai-core              | -                       | 16 | 6              | 0                 | 0                                  | 0                      | 6                                   | 4                     |
| N4                  | 0.2 µg                | dsTai-core              | -                       | 12 | 0              | 0                 | 0                                  | 0                      | 8                                   | 4                     |
| N4                  | 3 µg                  | dsTai-in-1              | dsTai-in-1              | 27 | 5              | 0                 | 19                                 | 3                      | 0                                   | 0                     |
| N4                  | 3 µg                  | dsTai-in-2              | dsTai-in-2              | 33 | 8              | 8                 | 0                                  | 0                      | 0                                   | 17                    |
| N4                  | 3 µg                  | dsMock                  | dsMock                  | 10 | 0              | 0                 | 0                                  | 0                      | 0                                   | 10                    |
| N4                  | 3 + 3 µg              | dsTai-in-1 + dsTai-in-2 | dsTai-in-1 + dsTai-in-2 | 20 | 7              | 0                 | 13                                 | 0                      | 0                                   | 0                     |
| N4                  | 6 µg                  | dsMock                  | dsMock                  | 15 | 0              | 0                 | 0                                  | 0                      | 0                                   | 15                    |
