# Supplementary material for: A Role for Taiman in Insect Metamorphosis
Source: PubMed Central journal article supplement (PMC4214675; doi:10.1371/journal.pgen.1004769), 2014-10-30
Supplement: pgen.1004769.s008.pdf [file pgen.1004769.s008.pdf]

**Table S2.** Primers used to detect transcript levels by qPCR in *Blattella germanica* tissues, to amplify the indel-1 region of *Tribolium castaneum* Taiman (TcTai indel 1), to prepare the dsRNAs for RNAi experiments and to construct the expression plasmids for reporter assays.

| Primer set                 | Length (bp) | Forward primer (5'-3')                                          | Reverse primer (5'-3')                     | Encompassed Region                                                       |
|----------------------------|-------------|-----------------------------------------------------------------|--------------------------------------------|--------------------------------------------------------------------------|
| Met                        | 58 bp       | CTGTTGGGACATCAGCAGAA                                            | GGCAGGTGATGGAGTGAAGT                       | Nucleotide 470 to 527 of HG965209                                        |
| Kr-h1                      | 77 bp       | GCGAGTATTGCAGCAAATCA                                            | GGGACGTTCTTTTCGTATGGA                      | Nucleotide 493 to 569 of HE575250                                        |
| BR-C                       | 76 pb       | CGGGTCGAAGGAAAGACA                                              | CTTGCGCCGAATGCTGCGAT                       | Nucleotide 699 to 774 of FN651774                                        |
| Tai                        | 50 pb       | GCAGCGAGTAATTGGACACA                                            | TTTTGCTGTTGCTGTTGGAG                       | Nucleotide 4288 to 4337 of HG965205                                      |
| EcR                        | 163 bp      | GACAAACTCCTCAGAGAAGATCAA<br>A                                   | CTCCCAATCCTGCCAGACTA                       | Nucleotide 1472 to 1634 of AM039690                                      |
| RXR                        | 86 pb       | ATAATTGACAAGAGGCAGAGGAA                                         | TGAACAGCCTCCCTCTTCAT                       | Nucleotide 527 to 612 of AJ854490                                        |
| E75A                       | 101 bp      | GTGCTATTGAGTGTGCGACATGAT                                        | TCATGATCCCTGGAGTGGTAGAT                    | Nucleotide 58 to 158 of AM238653                                         |
| ILP-1                      | 96 bp       | AGAAGCAGAATTCCTTTCCG                                            | TCATCGACAATGCCTCCGT                        | Nucleotide 343 to 438 of BgILP-1 HG972850                                |
| Tai-A                      | 260 bp      | CACACACCAACCAATCACCA                                            | CCCCAAAGTTGCTTGCTATC                       | Nucleotide 4870 to 5129 of HG965205                                      |
| Tai-B                      | 241 bp      | CACACACCAACCAATCACCA                                            | CATAGTATTCAGAGGTAGGAA                      | Nucleotide 4870 to 5110 of HG965206                                      |
| Tai-C                      | 241 bp      | AGTTGCCAGGTGGTAACAATG                                           | CCCCAAAGTTGCTTGCTATC                       | Nucleotide 4613 to 4852 of HG965207                                      |
| Tai-D                      | 222 pb      | AGTTGCCAGGTGGTAACAATG                                           | CATAGTATTCAGAGGTAGGAA                      | Nucleotide 4613 to 4834 of HG965208                                      |
| Actin                      | 213 pb      | AGCTTCCTGATGGTCAGGTGA                                           | TGTCGGCAATTCCAGGGTACATGG<br>T              | Nucleotide 96 to 308 of AJ862721                                         |
| dsTai-core                 | 343 bp      | CAACTTCAACAGCAGCAGCAA                                           | AAGGACTCTTCATTACTGTT                       | Nucleotide 3169 to 3511 of HG965205                                      |
| dsTai-IN-1                 | 276 pb      | TGGAGTAAACTCCCCGCGGC                                            | CCACCGGGCTGGTGATTGGT                       | Nucleotide 4623 to 4789 of HG965205                                      |
| dsTai-IN-2                 | 74 pb       | GGTGCCAGTGATAGCAAGCA                                            | CTTGAGGAGGAGAGCCCGGG                       | Nucleotide 5101 to 5174 of HG965205                                      |
| dsMock                     | 307 bp      | ATCCTTTCCTGGGACCCGGCA                                           | ATGAAGGCTCGACGATCCTA                       | Nucleotide 370 to 676 of K01149                                          |
| TcTai indel 1              | 551 bp      | ACAGTTCACGCAACAGATGG                                            | AACTCAGACGTGGGCATTTTC                      | Nucleotide 3777 to 4490 of XM_962573                                     |
| pIZT_TcMet                 | 1578 bp     | AAAAAGCAGGCTTTCGAAGGAGATA<br>GAACCATGGTAGCTCCTTGTGAAC<br>TC     | AGAAAGCTGGGTCTCATACTTTGT<br>TACGAAGTAGTTGG | Nucleotide 139 to 1716 of AB360765                                       |
| pIZT_TcTai DEL-1           | 4056 bp     | AAAAAGCAGGCTTTCGAAGGAGATA<br>GAACCATGTTGGAACACAGTGCTA<br>TGATTT | AGAAAGCTGGGTCTCACCTGCC<br>GCGCCTC          | Nucleotide 1 to 4056 of AB762694                                         |
| Insert for pIZT_TcTai IN-1 | 192 bp      | GGCCTGGGATCCCCCGGC                                              | ACCGCTTGGAGGTGTGGGGG                       | ---                                                                      |
| Vector for pIZT_TcTai IN-1 | 7461 bp     | GTGTCCGCAAGTGCCCCACATC                                          | ACCTGGCAACTGGGTTGTGGCAG<br>TG              | pIZT_TcTai DEL-1 region distributed between 3855 and 3856 of TcTai DEL-1 |
